# Supplementary material for: Chirality and reversible solid state phase transition of a tetranuclear titanium oxido cluster
Source: Royal Society of Chemistry journal article supplement (doi:10.1039/c3nj40775f), 2013-01-01

## Supporting Informations

Figure S1. DSC measurement of 1.

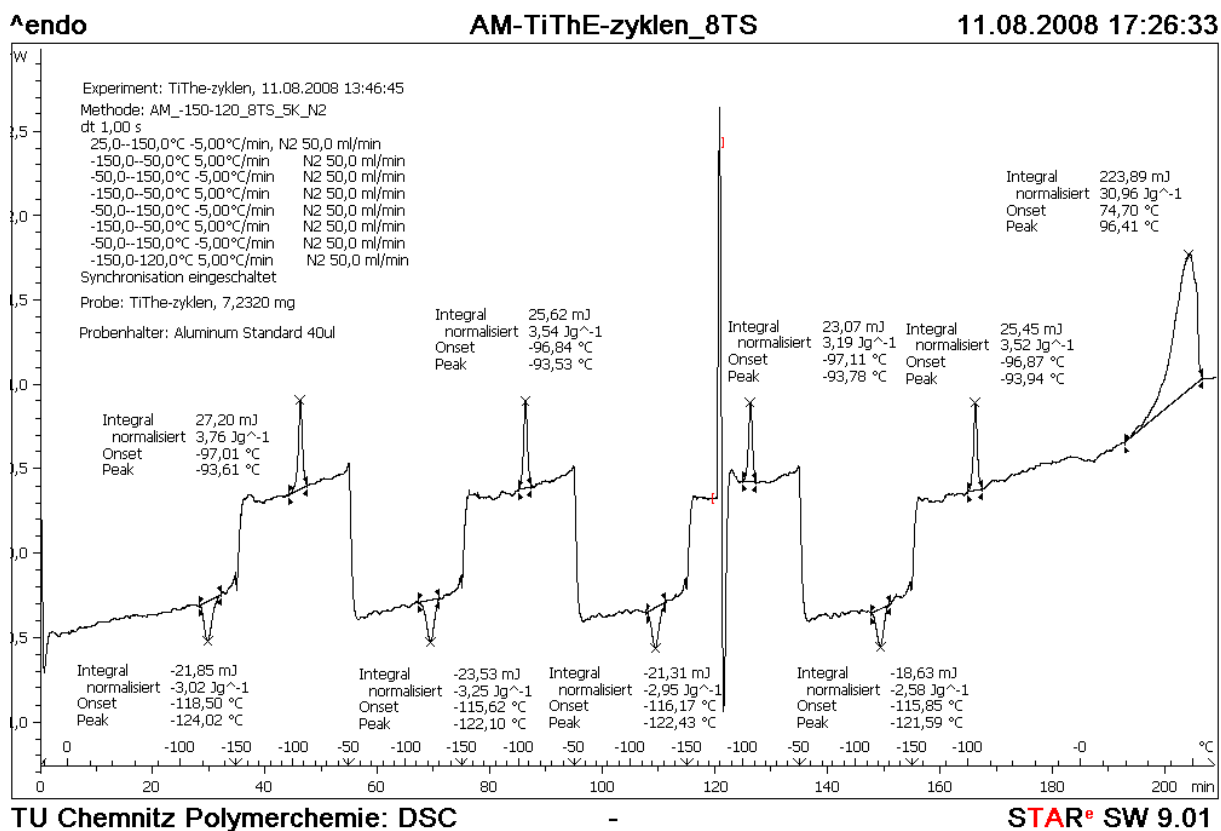

Failure of the DSC within the third measurement cycle.

**Figure S2.** Graphical illustration of the two different enantiomers of the title compound **1** (derived from the crystal structure of **1** measured at 200 K). All hydrogen atoms are omitted for clarity. Of disordered atoms only one atomic position is illustrated and only non-carbon atoms have been labelled. Please notice that the oxygen atoms O3 and O13 points out of the paper plane, whereas the oxygen atoms O4 and O12 points into the paper plane.

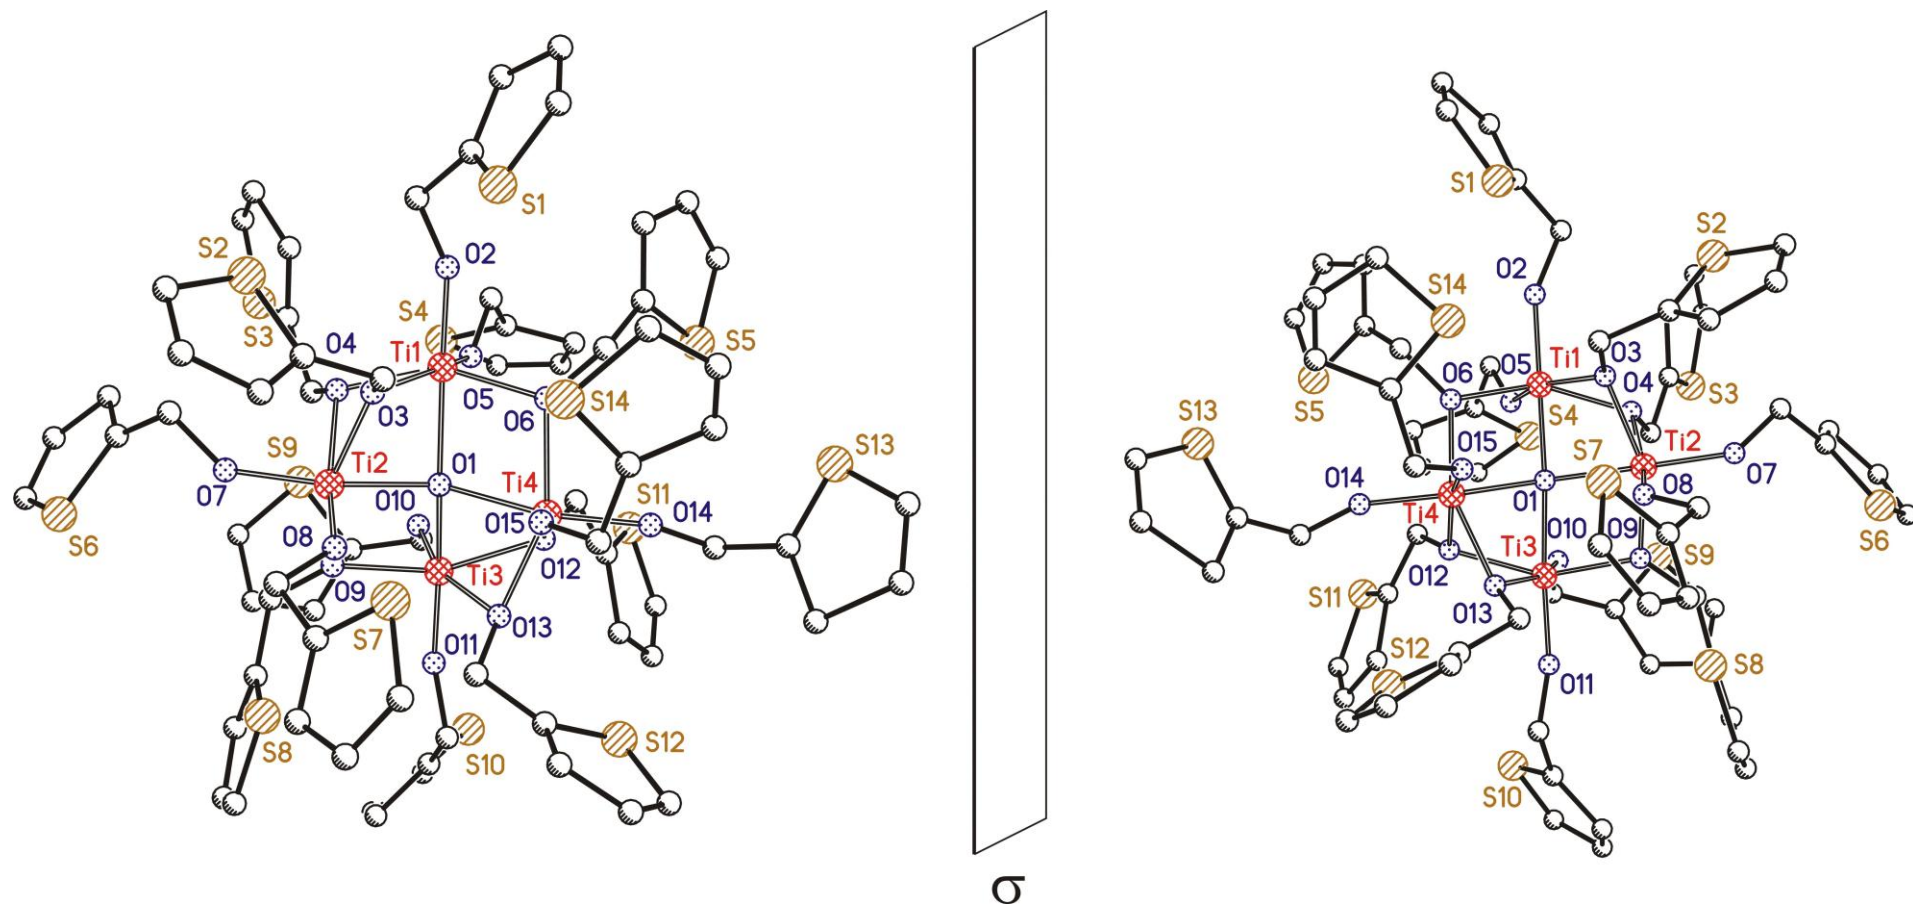

**Figure S3.** Stack plots of powder X-ray diffractograms of **1** at different temperatures.

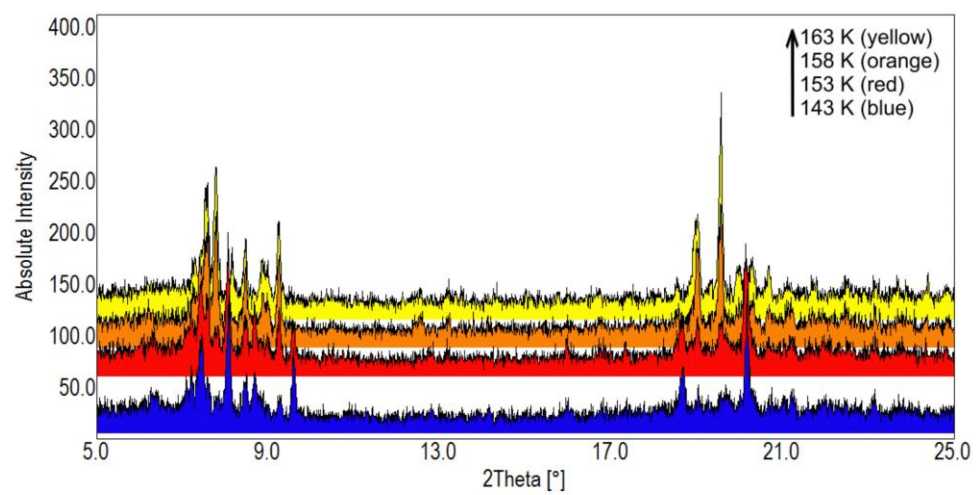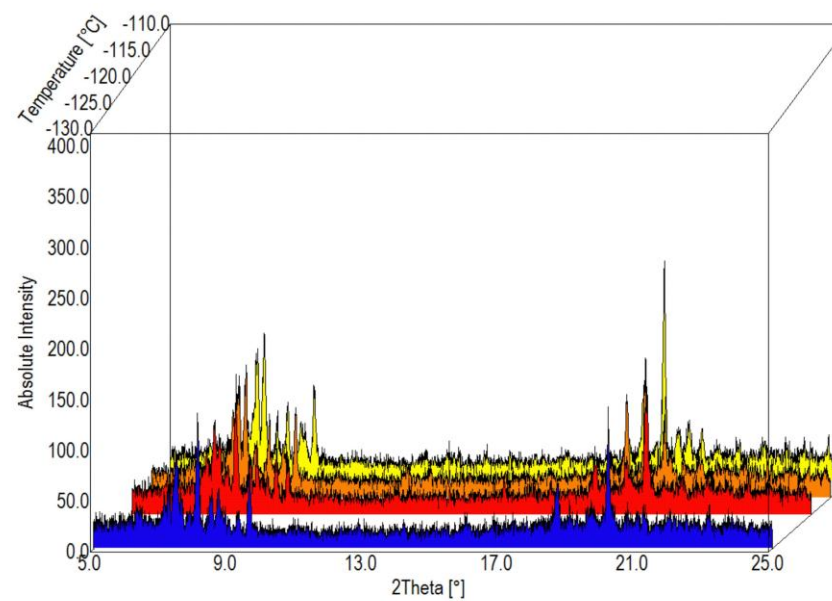

Supplement: c3nj40775f.pdf [file c3nj40775f.pdf]
